# Supplementary material for: Accuracy of administrative data for surveillance of healthcare-associated infections: a systematic review
Source: HighWire-hosted journal article supplement (doi:10.1136/bmjopen-2015-008424), 2015-08-01
Supplement: bmjopen-2015-008424supp.pdf [file bmjopen-2015-008424supp.pdf]

## Supplementary data

“Accuracy of administrative data for surveillance of healthcare-associated infections: a systematic review”

### **Authors:**

Maaïke S.M. van Mourik, Pleun Joppe van Duijn, Karel G.M. Moons, Marc J.M. Bonten, Grace M. Lee

### **Contents:**

**S1.** Search strategy

**S2.** Data collection, quality assessment items and assumptions

**S3.** Risk of bias individual studies

**S4.** Summary risk of bias, by HAI type

**S5.** Forest plots for specificity and negative predictive value.

**S6:** Administrative data algorithm, by HAI type

## S1. Search Strategy

Databases: Medline/Pubmed, EMBASE, CINAHL, Cochrane.

All searches in Titles + Abstract

Limits: Published between after 1995, Languages: English, Dutch, French, German

Search dates: Initial search march 8<sup>th</sup> 2012, search closure March 1<sup>st</sup> 2013.

|                                          |                                                                                                                                                |
|------------------------------------------|------------------------------------------------------------------------------------------------------------------------------------------------|
| Outcome: Healthcare associated infection | Search terms :<br><i>Infection, infections, hai, infectious, sepsis, meningitis, notifiable, SSI, VAP, pneumonia, CAUTI, CLABSI, CABS, BSI</i> |
|------------------------------------------|------------------------------------------------------------------------------------------------------------------------------------------------|

AND

|                                  |                                                                                                                                                                                                                                                                                                                                                                                                            |
|----------------------------------|------------------------------------------------------------------------------------------------------------------------------------------------------------------------------------------------------------------------------------------------------------------------------------------------------------------------------------------------------------------------------------------------------------|
| Determinant: administrative data | Search terms :<br><i>ICD, international Classification of Diseases, administrative, discharge diagnos*, registry, registries, electronic data, claim data, claims data, reimbursement, health plan data, healthplan, medicare, diagnostic coding, discharge coding, discharge code(s), diagnostic coding, diagnostic code(s), diagnosis code(s), diagnosis coding, procedure code(s), procedure coding</i> |
|----------------------------------|------------------------------------------------------------------------------------------------------------------------------------------------------------------------------------------------------------------------------------------------------------------------------------------------------------------------------------------------------------------------------------------------------------|

## S2. Data collection, quality assessment items and assumptions

### General characteristics

| Item                                         | Options                                           | Considerations & assumptions                                                                                                                        |
|----------------------------------------------|---------------------------------------------------|-----------------------------------------------------------------------------------------------------------------------------------------------------|
| Author, year of publication                  |                                                   |                                                                                                                                                     |
| HAI studied                                  | SSI/BSI/sepsis/<br>CLABSI/VAP<br>/UTI/CAUTI/Other | More than 1 may apply<br>Specify details                                                                                                            |
| Systematic post-discharge surveillance?      | Yes/No                                            | Only code as yes if explicit aim of the study.                                                                                                      |
| Location of study                            | Country                                           |                                                                                                                                                     |
| Number of participating centers              |                                                   |                                                                                                                                                     |
| Start and stop of patient inclusion          |                                                   |                                                                                                                                                     |
| Validation of previously developed algorithm | Yes/No                                            | E.g. previous study, PHC4, PSI, HAC                                                                                                                 |
| Validation sample within the study           | Yes/No                                            |                                                                                                                                                     |
| Purpose of administrative data               | Billing/ benchmarking<br>/demographic/ unclear    | If U.S.: code as billing                                                                                                                            |
| Setting: Medicare, VA or HMO only?           | Yes/No (specify)                                  |                                                                                                                                                     |
| Healthcare setting                           | Primary care, Inpatient,<br>Outpatient, ICU       | More than 1 possible                                                                                                                                |
| Academic hospital                            | Yes/No/Mixed (if<br>multicenter)                  |                                                                                                                                                     |
| Public reporting                             | Yes/Potentially/No                                | Was the measure developed/tested as a means of public reporting or external quality benchmarking (as opposed to an in-hospital screening algorithm) |

### Assessment of risk of bias (adapted from QUADAS-2)

| PATIENT SELECTION  |                                                                         |                                                                                                                                            |                                                                                                                                                                                                                          |
|--------------------|-------------------------------------------------------------------------|--------------------------------------------------------------------------------------------------------------------------------------------|--------------------------------------------------------------------------------------------------------------------------------------------------------------------------------------------------------------------------|
| 1                  | Method of patient selection                                             | Describe in-/exclusion criteria                                                                                                            |                                                                                                                                                                                                                          |
| 2                  | Consecutive or random sample of patients enrolled                       | Yes/no                                                                                                                                     | Random sampling scored as yes                                                                                                                                                                                            |
| 3                  | Case-control design avoided                                             | Yes/No                                                                                                                                     |                                                                                                                                                                                                                          |
| 4                  | Inappropriate exclusions avoided?                                       | Yes/No                                                                                                                                     | Is the sample enrolled representative of the domain (e.g. no exclusion of high-risk patients?)                                                                                                                           |
| 5                  | Risk of bias patient selection                                          | Low/Unclear/High                                                                                                                           | If #2, #3 or #4 = no, consider risk of bias                                                                                                                                                                              |
| 6                  | Applicability patient selection                                         | Low/Unclear/High                                                                                                                           |                                                                                                                                                                                                                          |
| INDEX TEST         |                                                                         |                                                                                                                                            |                                                                                                                                                                                                                          |
| 1                  | Describe index test                                                     | Coding system used?<br>Codes assigned by?<br><br>Procedure codes to detect HAI?<br>PSI algorithm<br>List codes used, duration of follow-up | ICD-9 or ICD-10<br>Coders, physicians, other, unclear (US: professional coders assumed)<br>No if only used to identify patients at risk<br><br>Version number<br>Specify use of pre-defined methods (PHC4, PSI, CMS...). |
| 2                  | Were other tests assessed                                               | Yes/No, specify                                                                                                                            |                                                                                                                                                                                                                          |
| 3                  | Was the administrative data intended as the sole method of surveillance | Yes/no                                                                                                                                     | E.g. were results of administrative data intended to be combined with microbiology results?                                                                                                                              |
| 4                  | Was interpretation done without knowledge of the reference standard?    | Yes/no                                                                                                                                     | Were codes assigned without knowledge of reference standard?                                                                                                                                                             |
| 5                  | Pre-specified threshold                                                 | Yes/no                                                                                                                                     | Was code selection determined in advance?<br>If unspecified and only a very specific code is used, also code as yes (e.g. 998.5 for SSI)                                                                                 |
| 6                  | Risk of bias index test                                                 | Low/Unclear/High                                                                                                                           | If #4 or #5 = No, consider risk of bias.                                                                                                                                                                                 |
| 7                  | Applicability index test                                                | Low/Unclear/High                                                                                                                           | If #3 = No, score as High                                                                                                                                                                                                |
| REFERENCE STANDARD |                                                                         |                                                                                                                                            |                                                                                                                                                                                                                          |
| 1                  | Describe reference standard                                             | Method:<br>Definitions used:<br>Applied by:                                                                                                | Describe<br>NHSN/NNIS, (VA)SQIP, Clinical, Other<br>IP, trained nurses, physicians, other abstractor                                                                                                                     |

|                        |                                                                               |                  |                                                                                                                                                          |
|------------------------|-------------------------------------------------------------------------------|------------------|----------------------------------------------------------------------------------------------------------------------------------------------------------|
| 2                      | Is the reference standard likely to correctly classify the patient            | Yes/No           |                                                                                                                                                          |
| 3                      | Was it interpreted without knowledge of the index test?                       | Yes/No           | If only patients flagged by code are received reference standard and/or coding status was unblinded score as No                                          |
| 4                      | Risk of bias                                                                  | Low/Unclear/High | If #3 = No, consider risk of bias                                                                                                                        |
| 5                      | Applicability                                                                 | Low/Unclear/High |                                                                                                                                                          |
| <b>FLOW AND TIMING</b> |                                                                               |                  |                                                                                                                                                          |
| 1                      | Describe patients who did not receive 1 of both tests or are not in 2x2 table |                  | Draw flowchart                                                                                                                                           |
| 2                      | Did all patients receive the RS?                                              | Yes/No           | If only assessing patients with positive reference test, score as No                                                                                     |
| 3                      | Did all patients receive the same RS?                                         | Yes/No           | If all the patients receiving RS do not receive the <i>same</i> RS score as No.                                                                          |
| 4                      | Were all patients included in the analysis?                                   | Yes/No           |                                                                                                                                                          |
| 5                      | Could the patient flow have introduced bias and why?                          | Low/Unclear/High | If #2 or #3 = Yes, consider risk of bias.<br>If a large or important portion of patients are excluded (e.g. due to missing data), consider risk of bias. |
| 6                      | How were missing data handled?                                                | Description      |                                                                                                                                                          |

### Data extraction:

|              | HAI present | HAI absent | Total |
|--------------|-------------|------------|-------|
| Codes +      | TP          | FP         |       |
| Codes -      | FN          | TN         |       |
| <b>Total</b> |             |            |       |

### If only outcome measures are reported:

|             |  |                     |                  |
|-------------|--|---------------------|------------------|
| Sensitivity |  | PPV                 |                  |
| Specificity |  | NPV                 |                  |
| LR-         |  | LR+                 |                  |
| Kappa       |  | Degree of certainty | High – med – low |

### General remarks:

- If multiple index tests and/or reference standards and/or patient flow schemes are used in the study, all are assessed separately for their risk of bias (multiple comparisons).
- Data were extracted for each comparison presented, and also separately if
  - o Multiple types of HAI
  - o Multiple comparisons for each HAI
  - o If multiple specifications of administrative data

### **S3. Risk of bias individual studies, stratified in case of multiple comparisons**

#### **Abbreviations & Legend**

**HAI types:** (CA)UTI – (catheter-associated) urinary tract infection, (CLA)BSI – central-line associated bloodstream infection, Pneu – pneumonia, SSI – surgical site infection, VAP – ventilator-associated pneumonia.

**Country:** AUS – Australia, B E – Belgium, CAN – Canada, DK – Denmark, ESP – Spain, FI – Finland, FR – France, IT-Italy, JP – Japan, NL – Netherlands, USA – United States of America,

**Definition:** CDC-NHSN or CDC-NNIS – definitions from the Centers for Disease Control Healthcare Safety Network or its predecessor, (VA/N)SQIP – definitions & methods from the National (or Veteran’s Affairs) Surgical Quality Improvement Project.

**Intend appl:** Intended application of administrative data within HAI surveillance.

Ext – for external quality assessment, e.g. public reporting or pay-for-performance.

Int (S) – to support within hospital surveillance as sole method of finding possible HAI cases.

Int (C) – to support within hospital surveillance, combined with other indicators of HAI.

If applicable, specific metrics are indicated: HAC – Healthcare-associated condition as defined by the Centers for Medicare and Medicaid Services, PHC4 – code selection specified by the Pennsylvania Healthcare Cost Containment Council, PSI – Patient Safety Indicator.

N : design number

**Risk of bias (Rob) & applicability domains:** Patient selection (Pat Sel), Index test, Reference standard (Ref) and Flow. If a study assesses only the positive predictive value (partial verification, fully dependent on the index test – e.g. administrative data), and the risk of bias of the on the flow domain is low for the PPV estimate, these studies have been marked as “PPV” in the risk of bias on flow column. The overall risk of bias of the PPV estimate is marked in RoB PPV column.

#### **Notes:**

The following studies used the ICD-10 coding system: Curtis 2004, Daneman 2011, Gerbier 2011, Kanerva 2009, Lee 2011, Leth 2006, Leth 2010. Heisler 2009 used a different coding system.

In the following studies a present-on-admission indicator was explicitly included in the administrative data algorithm:

Cima 2011, Haley 2012, Koch 2012, Meddings 2010, Moehring 2013, Murff 2011, Tehrani 2013, Zrelak 2011

| Author & year     | HAI studied                  | Country | N Centers | Study period | definition | Intend appl | N | Risk of bias |            |      | Flow | Applicability |            |      | RoB PPV |
|-------------------|------------------------------|---------|-----------|--------------|------------|-------------|---|--------------|------------|------|------|---------------|------------|------|---------|
|                   |                              |         |           |              |            |             |   | Pat sel      | Index test | Ref  |      | Pat sel       | Index test | Ref  |         |
| Apte, 2011        | SSI,                         | USA     | 1         | 2007         | Unclear    | Int (C)     | 2 | Low          | Low        | High | Low  | Low           | Low        | High | High    |
| Apte, 2011        | SSI,                         | USA     | 1         |              | CDC NHSN   | Int (C)     |   | Low          | Low        | Low  | Uncl | Low           | Low        | Low  | Uncl    |
| Best, 2002        | SSI, Sepsis, Pneu, UTI,      | USA     | 123       | 1994 - 1995  | (VA/N)SQIP | Ext         | 1 | Uncl         | Low        | Low  | Low  | Low           | Low        | Low  | Uncl    |
| Bolon, 2009       | SSI,                         | USA     | 8         | 2002 - 2005  | CDC NHSN   | Int (C)     | 1 | Low          | Low        | Uncl | Low  | Low           | High       | Low  | Low     |
| Braun, 2006       | BSI,                         | USA     | 28        | 1999         | Clinical   | Ext*        | 1 | Uncl         | Low        | High | High | Low           | Low        | High | High    |
| Cadwallader, 2001 | SSI,                         | AUS     | 1         | 1998 - 1999  | CDC NNIS   | Int (S)     | 2 | Low          | Low        | Low  | Low  | Low           | Low        | Low  | Low     |
| Cadwallader, 2001 | SSI,                         | AUS     | 1         |              | CDC NNIS   | Int (S)     |   | Low          | Low        | High | High | Low           | Low        | Low  | High    |
| Calderwood, 2012  | SSI,                         | USA     | 4         | 2007         | CDC NHSN   | Int (S)     | 1 | Uncl         | Uncl       | High | High | Low           | Low        | Low  | High    |
| Calderwood, 2013  | SSI,                         | USA     | 3296      | 2005 - 2007  | CDC NHSN   | Ext         | 2 | Low          | Low        | High | PPV  | Low           | Low        | Low  | High    |
| Calderwood, 2013  | SSI,                         | USA     | 3296      |              | CDC NHSN   | Ext         |   | Low          | High       | High | PPV  | Low           | Low        | Low  | High    |
| Campbell, 2011    | SSI, UTI,                    | USA     | 1         | 2008         | Other      | Int (S)     | 1 | Uncl         | Uncl       | Low  | Low  | Low           | Low        | High | Uncl    |
| Cevasco, 2011a    | CLABSI,                      | USA     | 28        | 2002 - 2007  | Other      | Ext PSI 3.1 | 1 | Low          | Low        | High | PPV  | Low           | Low        | Low  | High    |
| Cevasco, 2011b    | Sepsis,                      | USA     | 75        | 2003 - 2007  | Other      | Ext PSI 3.1 | 2 | Low          | Low        | High | PPV  | Low           | Low        | Low  | High    |
| Cevasco, 2011b    | Sepsis,                      | USA     | 75        |              | Unclear    | Ext PSI 3.1 |   | Low          | Low        | High | PPV  | Low           | Low        | Low  | High    |
| Cima, 2011        | CLABSI, Sepsis,              | USA     | 1         | 2006 - 2009  | (VA/N)SQIP | Ext PSI 3.1 | 1 | Low          | Low        | Low  | Low  | Low           | Low        | Low  | Low     |
| Curtis, 2004      | SSI,                         | AUS     | 1         | 2001 - 2002  | Other      | Int (S)     | 2 | Low          | Low        | Low  | Low  | Low           | Low        | Low  | Low     |
| Curtis, 2004      | SSI,                         | AUS     | 1         |              | Other      | Int (S)     |   | Low          | Low        | Uncl | High | Low           | Low        | Low  | High    |
| Daneman, 2011     | SSI,                         | CAN     | 1         | 2008 - 2009  | CDC NHSN   | Int (S)     | 1 | Uncl         | Low        | Low  | Low  | Low           | Low        | Low  | Uncl    |
| Drees, 2010       | VAP,                         | USA     | 1         | 2007 - 2008  | CDC NHSN   | Int (S)     | 1 | Low          | Low        | Low  | Uncl | Low           | Low        | Low  | Low     |
| Gerbier, 2011     | SSI, BSI, CLABSI, UTI, Pneu, | FR      | 1         | 2000 - 2007  | Other      | Int (S)     | 1 | Low          | Low        | Low  | Uncl | Low           | Low        | Low  | Low     |
| Haley, 2012       | SSI,                         | USA     | 176       | 2008 - 2010  | CDC NHSN   | Ext         | 2 | Low          | Uncl       | Low  | Low  | Low           | Low        | Low  | Low     |
| Haley, 2012       | SSI,                         | USA     | 176       |              | CDC NHSN   | Ext         |   | Low          | Uncl       | High | High | Low           | Low        | Low  | High    |
| Hebden, 2000      | SSI,                         | USA     | 1         | 1997         | CDC NNIS   | Int (S)     | 1 | Low          | Low        | Low  | Low  | Low           | Low        | Low  | Low     |
| Heisler, 2009     | UTI, CAUTI,                  | USA     | 1         | 2004 - 2005  | Clinical   | Int (S)     | 1 | Low          | Low        | High | Uncl | Low           | Low        | Uncl | High    |
| Hollenbeak, 2011  | SSI,                         | USA     | 1         | 2007 - 2008  | CDC NHSN   | Int (S)     | 1 | Low          | Low        | Low  | Low  | Low           | Low        | Low  | Low     |
| Houglund, 2008    | BSI, Pneu                    | USA     | 77        | 2001 - 2003  | Unclear    | Ext         | 1 | Low          | Low        | Low  | Uncl | Low           | Low        | Uncl | Low     |
|                   |                              |         |           |              |            |             |   |              |            |      |      |               |            |      |         |

| Author & year   | HAI studied             | Country | N Centers | Study period | definition | Intend appl  | N | Pat sel | Risk of bias |      |      | Applicability |            |      | RoB PPV |
|-----------------|-------------------------|---------|-----------|--------------|------------|--------------|---|---------|--------------|------|------|---------------|------------|------|---------|
|                 |                         |         |           |              |            |              |   |         | Index test   | Ref  | Flow | Pat sel       | Index test | Ref  |         |
| Huang, 2011     | SSI,                    | USA     | 671       | 2005         | CDC NHSN   | Ext          | 3 | Low     | High         | High | High | Low           | Low        | Low  | High    |
| Huang, 2011     | SSI,                    | USA     | 671       |              | Unclear    | Ext          |   | Low     | Low          | High | Uncl | Low           | Low        | High | High    |
| Huang, 2011     | SSI,                    | USA     | 671       |              | CDC NHSN   | Ext          |   | Low     | Low          | High | High | Low           | Low        | Low  | High    |
| Inacio, 2011    | SSI,                    | USA     | ?         | 2006 - 2008  | CDC NHSN   | Int (S)      | 1 | Low     | Low          | Low  | Low  | Low           | Low        | Low  | Low     |
| Julian, 2006    | SSI, VAP, UTI, CAUTI,   | USA     | 1         | 2004         | CDC NHSN   | Ext PHC4     | 1 | Low     | Low          | High | High | Low           | Low        | Low  | High    |
| Kanerva, 2009   | SSI, BSI, UTI, Pneu,    | FI      | 20        | 2005         | Other      | Int (S)      | 1 | Low     | Uncl         | Low  | Low  | Low           | Low        | Low  | Uncl    |
| Koch, 2012      | Sepsis,                 | USA     | 1         | 2009 - 2010  | (VA/N)SQIP | Ext PSI 4.2  | 2 | Low     | Low          | Low  | Low  | Low           | Low        | Low  | Low     |
| Koch, 2012      | Sepsis,                 | USA     | 1         |              | Other      | Ext PSI 4.2  |   | Low     | Low          | Low  | Low  | Low           | Low        | Low  | Low     |
| Landers, 2010   | UTI,                    | USA     | 1         | 2007         | Other      | Int (S)      | 1 | Low     | Low          | Low  | Low  | Low           | Low        | High | Low     |
| Lawson, 2012    | SSI, Sepsis, Pneu, UTI, | USA     | 214       | 2005 - 2008  | (VA/N)SQIP | Ext          | 1 | Low     | Uncl         | Low  | Low  | Low           | Low        | Low  | Uncl    |
| Lee, 2011       | SSI, BSI, Pneu, UTI,    | JP      | 4         | 2005 - 2009  | CDC NHSN   | Int (C) PHC4 | 1 | Low     | Low          | Low  | Low  | High          | High       | Low  | Low     |
| Leth, 2006      | SSI,                    | DK      | 1         | 1999 - 2002  | CDC NHSN   | Int (C)      | 2 | Low     | Uncl         | Low  | Low  | Low           | High       | Low  | Low     |
| Leth, 2006      | SSI,                    | DK      | 1         | 1999 - 2002  | CDC NHSN   | Int (C)      |   | Uncl    | Low          | Uncl | Low  | Low           | Low        | Low  | Uncl    |
| Leth, 2010      | SSI                     | DK      | 3         | 2007 - 2008  | CDC NHSN   | Int (C)      | 1 | Low     | Low          | Low  | High | Low           | High       | Low  | High    |
| Meddings, 2010  | CAUTI,                  | USA     | 1         | 2006 - 2007  | Other      | Ext HAC      | 1 | Low     | Low          | High | High | Low           | Low        | High | High    |
| Miner, 2004     | SSI,                    | USA     | 7         | 1996 - 1999  | CDC NNIS   | Int (C)      | 1 | Low     | Low          | High | High | Low           | High       | Low  | High    |
| Moehring, 2013  | CLABSI,                 | USA     | 3         | 2007 - 2009  | CDC NHSN   | Ext HAC      | 1 | Low     | Low          | Low  | High | Low           | Low        | Low  | Low     |
| Moro, 2004      | SSI,                    | IT      | 31        | 2001         | CDC NNIS   | Int (S)      | 1 | Low     | Uncl         | Low  | Low  | Low           | Low        | Low  | Uncl    |
| Murff, 2011     | Sepsis, Pneu            | USA     | 6         | 1999 - 2006  | (VA/N)SQIP | Ext PSI 3.1  | 1 | Low     | Low          | Low  | Low  | Low           | Low        | Low  | Low     |
| Ollendorf, 2002 | Sepsis,                 | USA     | 10        | Uncl         | Clinical   | Int (S)      | 1 | Uncl    | Uncl         | Low  | Low  | Uncl          | Low        | High | Uncl    |
| Olsen, 2010     | SSI,                    | USA     | 1         | 1998 - 2002  | CDC NHSN   | Int (S)      | 1 | Uncl    | Low          | High | High | Low           | Low        | Low  | High    |
| Platt, 2002     | SSI,                    | USA     | 4         | 1996 - 1999  | CDC NNIS   | Int (C)      | 1 | Uncl    | Low          | High | High | Low           | High       | Low  | High    |
| Pokorny, 2006   | CLABSI, VAP, CAUTI,     | ESP     | 1         | 1999 - 2002  | CDC NHSN   | Int (C)      | 1 | Low     | Uncl         | Low  | Low  | Low           | High       | Uncl | Uncl    |
| Romano, 2009    | Sepsis,                 | USA     | 110       | 2000 - 2001  | (VA/N)SQIP | Ext PSI 2.1  | 2 | Low     | Low          | Low  | Low  | Low           | Low        | Low  | Low     |
| Romano, 2009    | Sepsis,                 | USA     | 110       | 2000 - 2001  | (VA/N)SQIP | Ext PSI 2.1  |   | Low     | High         | Low  | Low  | Low           | Low        | Low  | High    |
| Sands, 2003     | SSI,                    | USA     | 5         | 1995 - 1997  | CDC NNIS   | Int (C)      | 1 | Uncl    | Low          | High | High | Low           | High       | Low  | High    |

| Author & year    | HAI studied              | Country | N Centers | Study period | definition | Intend appl | N | Pat sel | Risk of bias |      |      | Applicability |            |      | RoB PPV |
|------------------|--------------------------|---------|-----------|--------------|------------|-------------|---|---------|--------------|------|------|---------------|------------|------|---------|
|                  |                          |         |           |              |            |             |   |         | Index test   | Ref  | Flow | Pat sel       | Index test | Ref  |         |
| Scanlon, 2008    | CLABSI, Sepsis,          | USA     | 28        | 2003 - 2005  | Other      | Ext PDI     | 1 | Low     | Low          | High | PPV  | Low           | Low        | High | High    |
| Sherman, 2006    | SSI, CLABSI, VAP, CAUTI, | USA     | 1         | 2004         | CDC NHSN   | Ext PHC4    | 1 | Low     | Low          | High | High | Low           | Low        | Low  | High    |
| Song, 2008       | SSI,                     | USA     | 1         | 2005         | CDC NNIS   | Int (C)     | 1 | Low     | Uncl         | Low  | Low  | Low           | High       | Low  | Uncl    |
| Spolaore, 2005   | SSI,                     | IT      | 3         | 2001         | CDC NHSN   | Int (C)     | 1 | Low     | Low          | High | PPV  | Low           | High       | Low  | High    |
| Stamm, 2012      | CLABSI, VAP, CAUTI,      | USA     | 1         | 2009         | CDC NHSN   | Int (S)     | 1 | Low     | Uncl         | Uncl | High | Low           | Low        | Low  | High    |
| Stevenson, 2008  | SSI, CLABSI, VAP,        | USA     | 1         | 2005         | CDC NHSN   | Ext PHC4    | 2 | Low     | Low          | Low  | Low  | Low           | Low        | Low  | Low     |
| Stevenson, 2008  | SSI, CLABSI, VAP,        | USA     | 1         | 2005         | CDC NHSN   | Ext PHC4    |   | Low     | Low          | Uncl | High | Low           | Low        | Low  | High    |
| Stone, 2007      | CLABSI,                  | USA     | 24        | 2002         | CDC NHSN   | Ext PSI 2.1 | 1 | Low     | Low          | Low  | Low  | Low           | Low        | Low  | Low     |
| Tehrani, 2013    | CLABSI,                  | USA     | 6         | 2009 - 2011  | CDC NHSN   | Ext HAC     | 2 | Low     | Low          | Low  | Low  | Low           | Low        | Low  | Low     |
| Tehrani, 2013    | CLABSI,                  | USA     | 6         | 2009 - 2011  | CDC NHSN   | Ext HAC     |   | Low     | Low          | Uncl | PPV  | Low           | Low        | Low  | Low     |
| Tinelli, 2011    | SSI, UTI,                | USA     | 28        | 2005 - 2006  | CDC NHSN   | Int (S)     | 1 | Low     | Uncl         | Low  | Low  | Low           | Low        | Low  | Uncl    |
| van Mourik, 2013 | Drain-related meningitis | NL      | 1         | 2004 - 2010  | CDC NHSN   | Int (S)     | 1 | Uncl    | Low          | Low  | Low  | Low           | Low        | Low  | Uncl    |
| Verelst, 2010    | SSI, Sepsis, VAP,        | BE      | 8         | 2005         | Clinical   | Ext PSI 3.1 | 1 | High    | Low          | Low  | Uncl | Low           | Low        | Low  | High    |
| Yokoe, 2001      | Postpartum               | USA     | 1         | 1993 - 1995  | CDC NNIS   | Int (C)     | 1 | Low     | Low          | High | High | Low           | High       | Low  | High    |
| Yokoe, 2004      | SSI,                     | USA     | 13        | 1998 - 2001  | CDC NNIS   | Int (C)     | 2 | Low     | Low          | High | High | Low           | High       | Low  | High    |
| Yokoe, 2004      | SSI,                     | USA     | 13        | 1998 - 2001  | CDC NNIS   | Int (C)     |   | Low     | Low          | High | Uncl | Low           | High       | Low  | High    |
| Yokoe, 2012      | SSI,                     | USA     | 5         | 2003 - 2005  | CDC NHSN   | Int (C)     | 1 | Low     | Low          | Uncl | Low  | Low           | High       | Low  | Low     |
| Zhan, 2009       | CAUTI,                   | USA     | uncl      | 2005 - 2006  | Other      | Ext         | 1 | Uncl    | Uncl         | Low  | Low  | Low           | Low        | Uncl | Uncl    |
| Zrelak, 2011     | CLABSI,                  | USA     | 23        | 2005         | CDC NHSN   | Ext PSI 3.1 | 1 | Low     | Low          | High | PPV  | Low           | Low        | Low  | High    |



### S4. Summary risk of bias, by HAI type.

Risk of bias was assessed using the *Quality Assessment for Diagnostic Accuracy Studies (QUADAS-2)* methods. Some studies contain multiple comparisons; in this case the lowest risk of bias per study is included. Shading denotes studies where extraction of complete two-by-two tables was not possible, including studies only assessing positive predictive values.

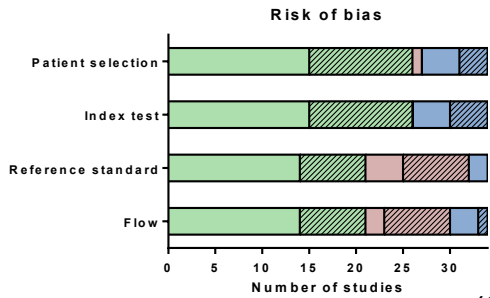

### SSI

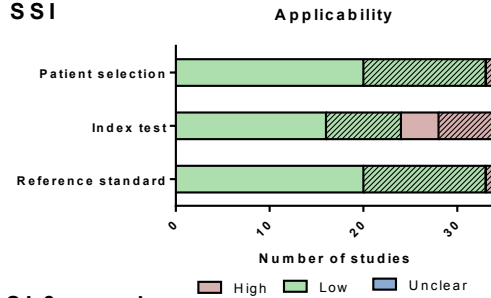

### (CLA)BSI & sepsis

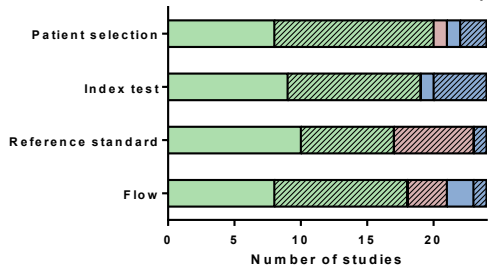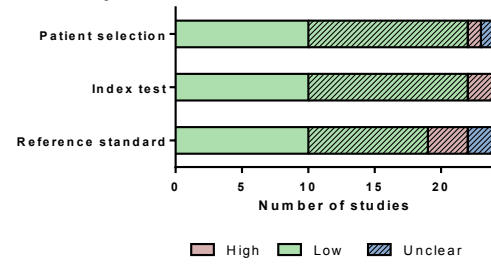

### (CA)UTI

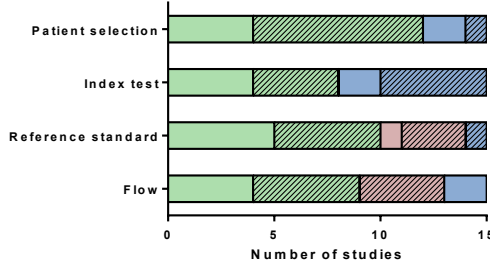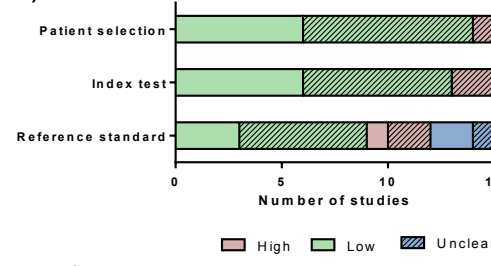

### Pneumonia & VAP

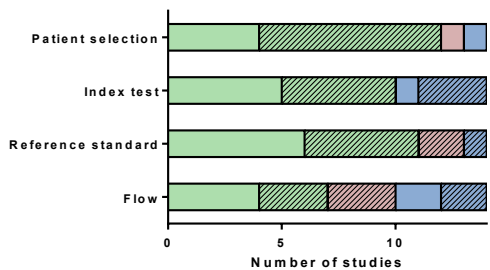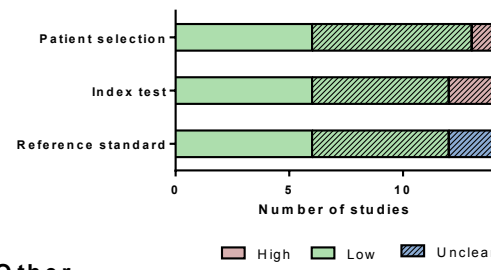

### Other

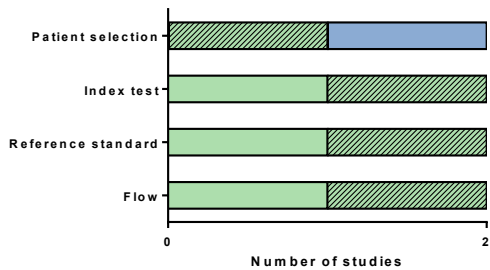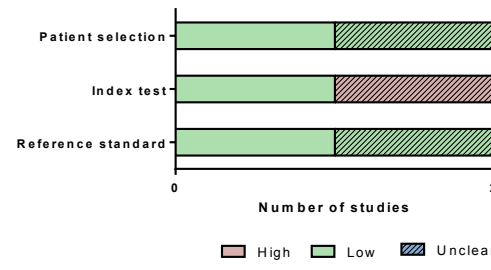

**Figure S5. Forest plots for specificity and negative predictive value, stratified by HAI type and relevant study characteristics.**

Studies are grouped by the intended application of administrative data:

Int (S) – used in isolation to support within-hospital surveillance efforts,

Int (C) – used to support within-hospital surveillance, combined with other indicators of infection,

Ext – for external quality assessment, including public reporting and pay-for-performance.

In studies including multiple specifications of the administrative data algorithm, these are numbered sequentially.

95% confidence intervals are derived using the exact binomial method.

Abbreviations: BSI – bloodstream infection, CABG – coronary artery bypass graft, DRM – drain-related meningitis, Ortho – orthopedic Procedure, PSI – Patient safety indicator, Sep – Sepsis, SSI – surgical site infection, UTI – urinary tract infection.

#: reference standard from Surgical Quality ImProvement Project (NSQIP or VASQIP). \*: Code selection based on specification from Pennsylvania Health Cost Containment Council. \*\*: HAC specification.

A. Surgical site infection, B. (Catheter-associated) bloodstream infection, C. (Catheter-associated) urinary tract infection, D. (Ventilator-associated) pneumonia. E. Other HAI or studies Extending only data aggregated for multiple types of infection.

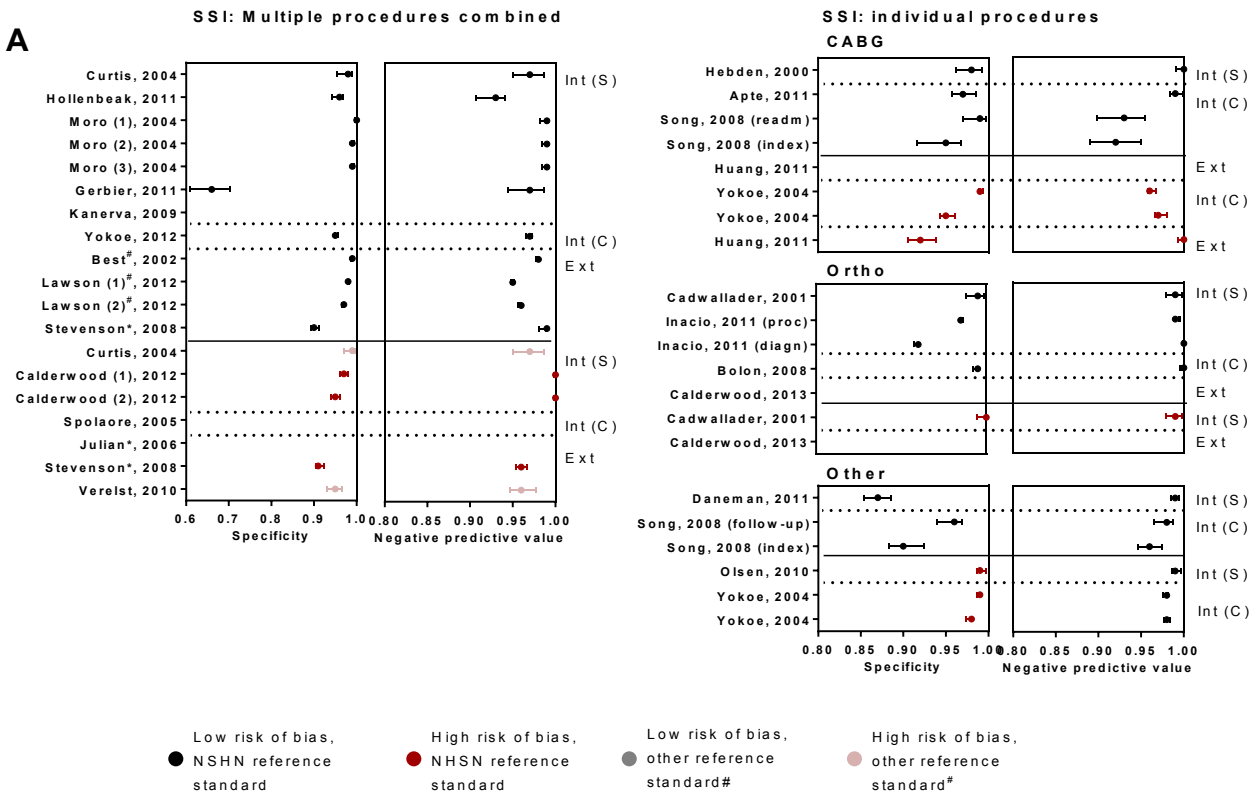

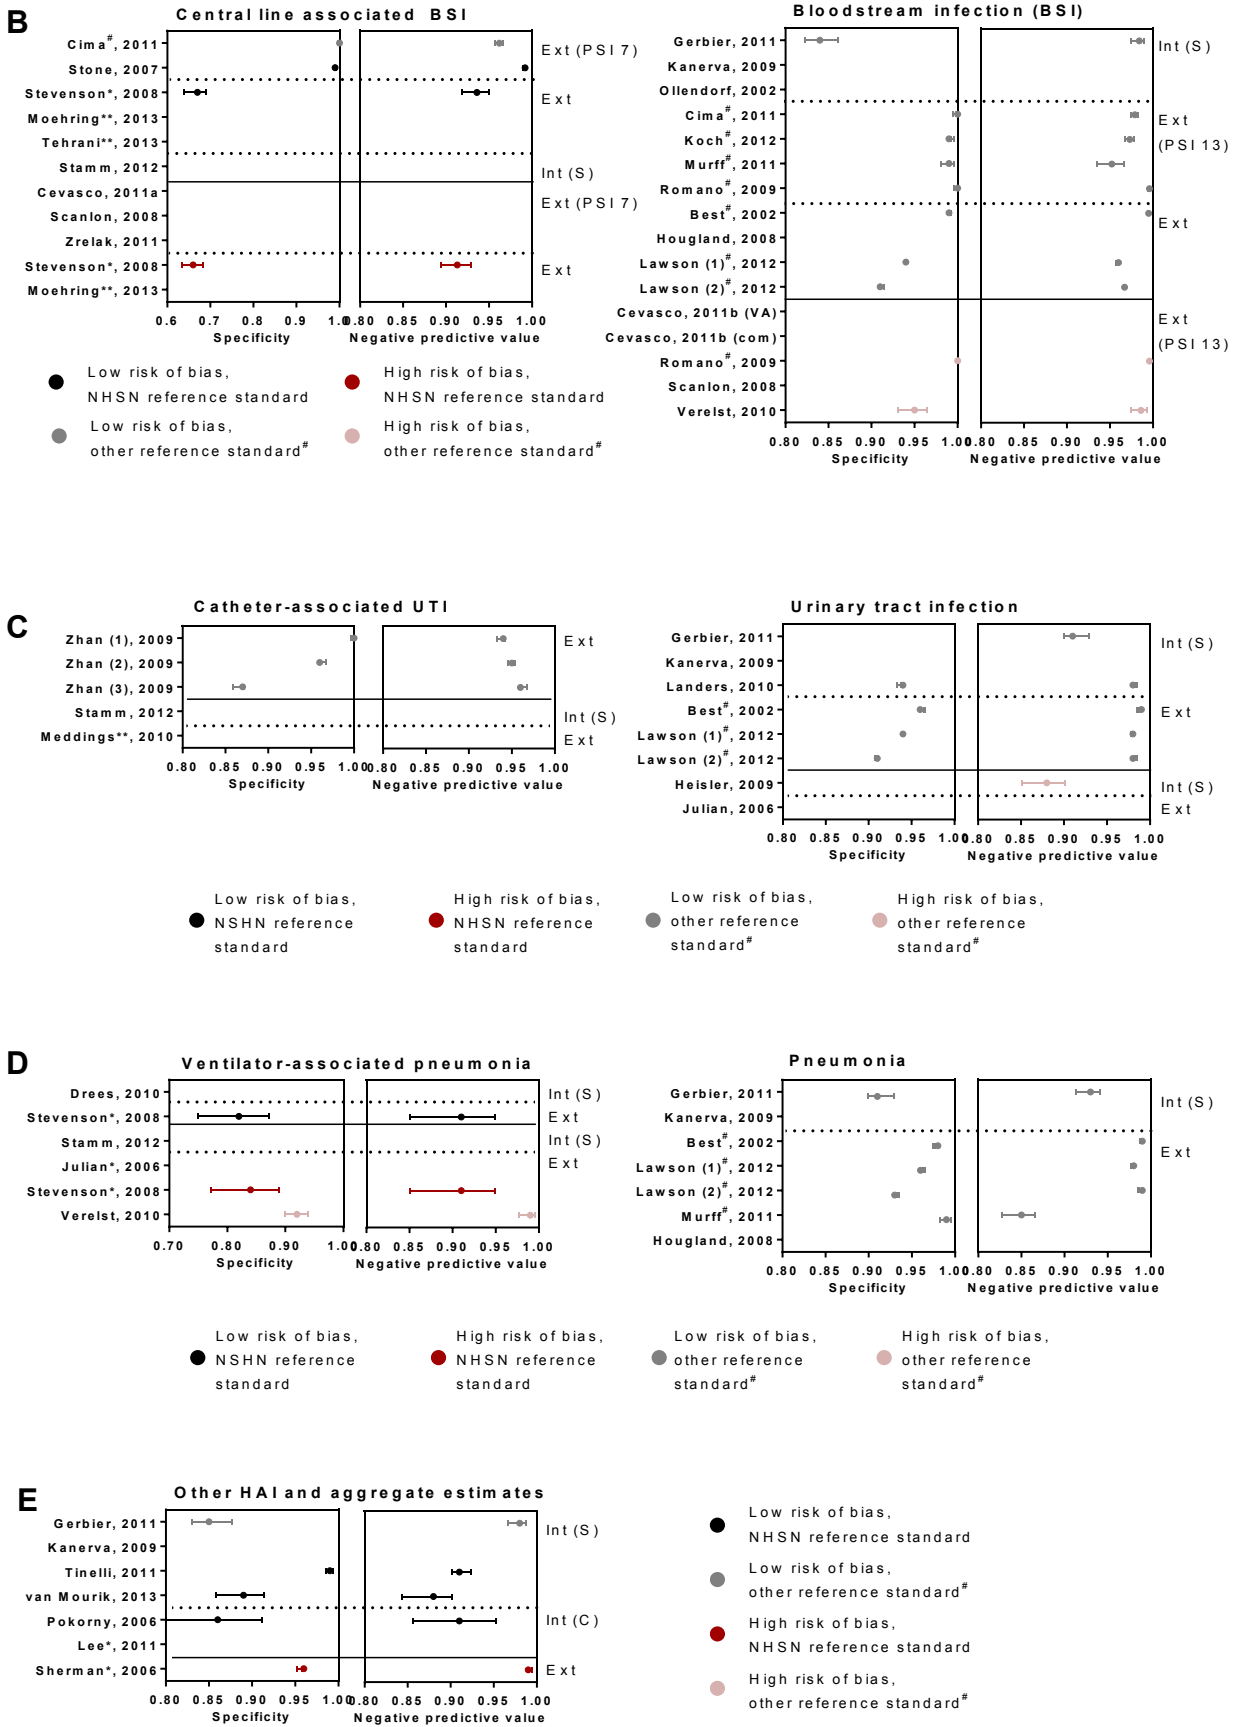

**Table S6: Administrative data algorithm, by HAI type**

\*: studies presenting only accuracy estimates aggregated over multiple types of HAI.

†: studies assessing an algorithm combining multiple sources of data that did not allow for data-extraction for administrative data only.

**SSI – CABG**

| Study       | Codes used (Inpatient only, primary & secondary codes unless specified)                                                                                                                                                                                                                                                                                                                                                                                                                                                                                                                                                                                                                                      | Duration of follow-up | Includes readmissions | Purpose of algorithm |
|-------------|--------------------------------------------------------------------------------------------------------------------------------------------------------------------------------------------------------------------------------------------------------------------------------------------------------------------------------------------------------------------------------------------------------------------------------------------------------------------------------------------------------------------------------------------------------------------------------------------------------------------------------------------------------------------------------------------------------------|-----------------------|-----------------------|----------------------|
| Apte 2011   | ICD-9: 998.5, 998.51, 998.59                                                                                                                                                                                                                                                                                                                                                                                                                                                                                                                                                                                                                                                                                 | 30d                   | Yes                   | Internal, comb       |
| Hebden 2000 | ICD-9 : 998.59                                                                                                                                                                                                                                                                                                                                                                                                                                                                                                                                                                                                                                                                                               | Unclear               | Unclear               | Internal, sole       |
| Huang 2011  | ICD-9: 34.01 34.02 34.10 86.01 86.04 86.09 86.22 86.28 91.71 91.72 91.73 513.1 519.2 682.2 682.3 682.8 686.8 686.9 730.00 730.08 730.09 730.20 730.28 730.29 730.30 730.38 730.39 730.80 730.88 730.39 730.90 730.98 730.99 785.52 790.7 875.0 879.8 879.9 891.0 891.1 996.60 996.61 99.62 996.71 998.31 998.32 998.51 998.83 998.9 11043 11044 12020 12021 13160 50000 50005 39000 39010;<br>The algorithm was refined after piloting; unclear which codes are included in further analyses. Includes outpatient codes                                                                                                                                                                                      | 60d                   | Yes                   | External             |
| Platt 2002† | ICD-9: 998.0, 998.3, 998.5, 998.51, 998.59, 998.83, 780.6, 891.0, 891.1, 682.6, 682.9, 998.9, 38.0, 38.1, 38.10, 38.11, 38.19, 38.2, 38.3, 38.4, 38.40, 38.41, 38.42, 38.43, 38.44, 38.49, 38.8, 38.9, 790.7, 611.0, 682.0, 682.1, 682.2, 682.3, 682.4, 682.5, 682.6, 682.7, 682.8, 682.9, 686.0, 686.1, 686.8, 686.9, 958.3, 711.00, 996.6, 996.60, 996.61, 996.62, 996.63, 996.64, 996.65, 996.66, 996.67, 996.68, 996.69, 674.3, 879.0, 879.1, 879.2, 879.3, 879.4, 879.5, 879.6, 879.7, 879.8, 879.9, 875.0, 875.1 (also in outpatient setting).<br>CPT: 87040, 87072, 87075, 87076, 87081, 87082, 87083, 87084, 10180, 11000, 11001, 15852<br>Note: the codes are included in a multivariable algorithm | 30d                   | Yes                   | Internal, comb       |
| Sands 2003† | Similar (or identical to Platt 2002)                                                                                                                                                                                                                                                                                                                                                                                                                                                                                                                                                                                                                                                                         | 30d                   | Yes                   | Internal, comb       |
| Song 2008   | ICD-9: 998.51, 998.59, 875.1, 519.2, 780.6                                                                                                                                                                                                                                                                                                                                                                                                                                                                                                                                                                                                                                                                   | 60d                   | Yes                   | Internal, comb       |
| Yokoe 2004  | ICD-9: 998.5, 998.51, 998.50                                                                                                                                                                                                                                                                                                                                                                                                                                                                                                                                                                                                                                                                                 | 60d                   | Yes                   | Internal, comb       |

Abbreviations: CABG – coronary artery bypass graft, SSI – surgical site infection

**Table S6: Administrative data algorithm, by HAI type, cont'd**

\*: studies presenting only accuracy estimates aggregated over multiple types of HAI.

†: studies assessing an algorithm combining multiple sources of data that did not allow for data-extraction for administrative data only.

**SSI-Orthopedic**

| Study             | Codes used (Inpatient only, primary & secondary unless specified)                                                                                                                                                                                                                                                                                                                                                                                                                                                                                                                         | Duration of follow-up                                     | Includes readm | Purpose of algorithm |
|-------------------|-------------------------------------------------------------------------------------------------------------------------------------------------------------------------------------------------------------------------------------------------------------------------------------------------------------------------------------------------------------------------------------------------------------------------------------------------------------------------------------------------------------------------------------------------------------------------------------------|-----------------------------------------------------------|----------------|----------------------|
| Bolon 2009        | ICD-9: 998.5, 998.51, 998.51, 998.59, 996.66                                                                                                                                                                                                                                                                                                                                                                                                                                                                                                                                              | 365d                                                      | Yes            | Internal, comb       |
| Cadwallader, 2001 | ICD-9: 996.66, 998.5, E878.1                                                                                                                                                                                                                                                                                                                                                                                                                                                                                                                                                              | 30/365d                                                   | Yes            | Internal, sole       |
| Calderwood 2013   | <i>THA:</i><br>ICD-9 Procedures: 84.56, 86.01, 86.22, 86.28<br>ICD-9: 686.8, 686.9, 711.00, 711.05, 711.08, 711.09, 711.40, 711.45, 711.48, 711.49, 711.90, 711.95, 711.98, 711.99, 730.00, 730.05, 730.08, 730.09, 730.10, 730.15, 730.18, 730.19, 730.20, 730.25, 730.28, 730.29, 730.90, 730.95, 730.98, 730.99, 996.60, 996.66, 996.67, 996.69, 998.5, 998.51, 998.59, 998.6<br>CPT: 10140, 10160, 10180, 12021, 13160, 20000, 20005, 26990, 26991, 26992, 27030, 27070, 27090, 27091, 27122, 27301, 27303, 35860<br>(includes outpatient)                                            | 365d                                                      | Yes            | External             |
| Inacio 2011       | <i>1-120 day timeframe (wound only):</i><br>ICD-9: 998.30, 998.31, 998.32, 998.50, 998.51, 998.59, 680.5, 680.6, 680.9, 682.5, 682.6, 682.9, 686.9<br><i>1-400 day timeframe (deep)</i><br>ICD 9: 711, 711.0, 711.00, 711.05, 711.06, 711.09, 711.60, 711.65, 711.66, 711.69, 711.90, 711.95, 711.96, 711.99, 730.00, 730.05, 730.06, 730.09, 730.20, 730.25, 730.26, 730.29, 730.90, 730.95, 730.96, 730.99, 996.6, 996.60, 996.66, 996.67, 999.3<br>ICD-9 Procedure: 80.00, 80.05, 80.06, 80.10, 80.16, 80.15, 78.60, 78.65, 78.66, 78.67, 78.69, 81.91, 86.04<br>(includes outpatient) | 120d for superficial (wound) SSI<br><br>400d for deep SSI | Yes            | Internal, sole       |

Abbreviations: SSI – surgical site infections, THA – total hip arthroplasty

**Table S6: Administrative data algorithm, by HAI type, cont'd**

\*: studies presenting only accuracy estimates aggregated over multiple types of HAI.

†: studies assessing an algorithm combining multiple sources of data that did not allow for data-extraction for administrative data only.

**SSI-other**

| Study          | Target Procedure          | Codes used (Inpatient only, primary & secondary unless specified)                                                                                                                                                                                                                                                                                                                                                                                                                                                                                                                                                                                                                                                                                                                                                                | Duration of follow-up | Includes readm | Purpose of algorithm |
|----------------|---------------------------|----------------------------------------------------------------------------------------------------------------------------------------------------------------------------------------------------------------------------------------------------------------------------------------------------------------------------------------------------------------------------------------------------------------------------------------------------------------------------------------------------------------------------------------------------------------------------------------------------------------------------------------------------------------------------------------------------------------------------------------------------------------------------------------------------------------------------------|-----------------------|----------------|----------------------|
| Campbell 2011† | Spinal surgery            | Requested from corresponding authors; not available                                                                                                                                                                                                                                                                                                                                                                                                                                                                                                                                                                                                                                                                                                                                                                              | LoS                   | No             | Internal, sole       |
| Daneman 2011   | Caesarean section         | ICD-10: O85002, O86002, O86004, O86009, O90202, K630, K750, L0331, L0332, L0333, N151, N730, K658, K650, O85004, N719, O86804, T813, T814, T857, T86842, T86822, T86882<br>(includes outpatient)                                                                                                                                                                                                                                                                                                                                                                                                                                                                                                                                                                                                                                 | 30                    | Yes            | Internal, sole       |
| Leth 2010†     | Caesarean section         | ICD-10: T81.4, O86.0 (incl. outpatient)<br>Procedures: KLWB00, KMWB00, KLWC01, KMWC00, KMWC01                                                                                                                                                                                                                                                                                                                                                                                                                                                                                                                                                                                                                                                                                                                                    | 30                    | Yes            | Internal, comb       |
| Miner 2004†    | Breast, caesarean section | <i>Caesarean section</i><br>ICD-9: 038.038.0 038.1 038.10 038.11 038.19 038.3 038.4 038.40 038.42 038.43 038.44 038.49 038.8 038.9 040.0 040.8 040.82 040.89 041 041.0 041.00 041.01 041.03 041.04 041.05 041.09 041.1 041.10 041.11 041.19 041.3 041.4 041.6 041.7 041.8 041.82 041.83 041.84 041.85 041.89 041.9 614.0 614.2 614.3 614.5 614.9 615 615.0 615.9 670 670.0 670.00 670.02 670.04 672 672.0 672.00 672.02 672.04 673.3 673.30 673.31 673.32 673.33, 673.34 682 682.2 682.5 686 686.8 686.9 780.6 790.7 996.6 996.60 996.62 996.69 998.5 998.51 998.59<br>Procedure: 86.01 86.04 86.22 10060 10061 10160 10180 11000 11001<br><i>Breast</i><br>ICD-9: 675 675.0 675.00 675.01 675.02 675.03 675.04 675.1 675.10 675.11 675.12 675.13 675.14 675.2 675.20 675.21 675.22 675.23 675.24 675.8<br>(includes outpatient) | 30/60                 | Yes            | Internal, comb       |
| Olsen 2010     | Breast                    | ICD-9: 998.5, 998.51, 998.59, 996.69, 611.0, 682.2, 682.3<br>(in- and outpatient surgical care)                                                                                                                                                                                                                                                                                                                                                                                                                                                                                                                                                                                                                                                                                                                                  | 180                   | Yes            | Internal, sole       |

Abbreviations: LoS – length of stay, SSI – surgical site infection

**Table S6: Administrative data algorithm, by HAI type, cont'd**

\*: studies presenting only accuracy estimates aggregated over multiple types of HAI.

†: studies assessing an algorithm combining multiple sources of data that did not allow for data-extraction for administrative data only.

**SSI – all/combined**

| Study            | Procedure                  | Codes used (Inpatient only, primary & secondary unless specified)                                                                                                                                                                                                                                                                                                                                                                                                                                                                                                                                                                                                                                                                                                                                                                                                                                                                                                                                                                                                                                                                                                                                                                                                                                                                                                                                                                                                                                                                                                                                                                                                                                                                                                                                                                                                                   | Duration follow-up             | Includes readm | Purpose of algorithm |
|------------------|----------------------------|-------------------------------------------------------------------------------------------------------------------------------------------------------------------------------------------------------------------------------------------------------------------------------------------------------------------------------------------------------------------------------------------------------------------------------------------------------------------------------------------------------------------------------------------------------------------------------------------------------------------------------------------------------------------------------------------------------------------------------------------------------------------------------------------------------------------------------------------------------------------------------------------------------------------------------------------------------------------------------------------------------------------------------------------------------------------------------------------------------------------------------------------------------------------------------------------------------------------------------------------------------------------------------------------------------------------------------------------------------------------------------------------------------------------------------------------------------------------------------------------------------------------------------------------------------------------------------------------------------------------------------------------------------------------------------------------------------------------------------------------------------------------------------------------------------------------------------------------------------------------------------------|--------------------------------|----------------|----------------------|
| Best 2002        | All                        | ICD-9: 998.5                                                                                                                                                                                                                                                                                                                                                                                                                                                                                                                                                                                                                                                                                                                                                                                                                                                                                                                                                                                                                                                                                                                                                                                                                                                                                                                                                                                                                                                                                                                                                                                                                                                                                                                                                                                                                                                                        | LoS                            | No             | External             |
| Calderwood, 2012 | TKA, THA, Vascular surgery | <p><b>Limited list:</b><br/> <i>TKA/THA:</i><br/>                     ICD-9: 998.5, 998.51, 998.51, 998.59, 996.66<br/> <i>Vascular:</i><br/>                     ICD-9: 998.5, 998.51, 996.62</p> <p><b>Expanded list:</b><br/> <i>THA:</i><br/>                     Procedures: 84.56, 86.01, 86.22, 86.28<br/>                     ICD-9: 686.8, 686.9, 711.00, 711.05, 711.08, 711.09, 711.40, 711.45, 711.48, 711.49, 711.90, 711.95, 711.98, 711.99, 730.00, 730.05, 730.08, 730.09, 730.10, 730.15, 730.18, 730.19, 730.20, 730.25, 730.28, 730.29, 730.90, 730.95, 730.98, 730.99, 996.60, 996.66, 996.67, 996.69, 998.5, 998.51, 998.59, 998.6<br/>                     CPT: 10140, 10160, 10180, 12021, 13160, 20000, 20005, 26990, 26991, 26992, 27030, 27070, 27090, 27091, 27122, 27301, 27303, 35860<br/> <i>TKA:</i><br/>                     Procedures: 84.56, 86.01, 86.04, 86.22, 86.28<br/>                     ICD-9: 686.8, 686.9, 711.00, 711.05, 711.06, 711.08, 711.09, 711.40, 711.45, 711.46, 711.48, 711.49, 711.90, 711.95, 711.96, 711.98, 711.99, 730.00, 730.05, 730.06, 730.08, 730.09, 730.10, 730.15, 730.16, 730.18, 730.19, 730.20, 730.25, 730.26, 730.28, 730.29, 730.90, 730.95, 730.96, 730.98, 730.99, 996.60, 996.66, 996.67, 996.69, 998.5, 998.51, 998.59, 998.6<br/>                     CPT: 10140, 10160, 10180, 12021, 13160, 20000, 20005, 27301, 27303, 27310, 27488, 27603, 27604, 27607, 35860<br/> <i>Vascular</i><br/>                     Procedures: 54.0*, 54.19*, 86.01, 86.04, 86.22, 86.28<br/>                     ICD-9: 686.8, 686.9, 996.6, 996.62, 998.51, 998.59, 998.6<br/>                     CPT: 10140, 10160, 10180, 12021, 13160, 2000, 2005, 35840, 35840*, 35903, 35907*<br/>                     *only following a central vascular procedure<br/>                     (Includes outpatient codes)</p> | Vasc: 60d<br><br>TKA/THA: 365d | Yes            | Internal, sole       |
| Curtis 2004      | TKA, THA, vascular         | ICD-10 AM mapped to Cadwallader et al (+ T84.41)                                                                                                                                                                                                                                                                                                                                                                                                                                                                                                                                                                                                                                                                                                                                                                                                                                                                                                                                                                                                                                                                                                                                                                                                                                                                                                                                                                                                                                                                                                                                                                                                                                                                                                                                                                                                                                    | Unclear                        | Unclear        | Internal, sole       |
| Gerbier 2011     | All                        | ICD-10: T814, T815, T816, T826, T827, T835, T836, T845, T846, T847, T857, O860<br>*refer to manuscript for extended selection                                                                                                                                                                                                                                                                                                                                                                                                                                                                                                                                                                                                                                                                                                                                                                                                                                                                                                                                                                                                                                                                                                                                                                                                                                                                                                                                                                                                                                                                                                                                                                                                                                                                                                                                                       | LoS                            | No             | Internal, sole       |
| Haley 2012†      | CABG, colon, THA           | ICD-9 : 5912, 567.21, 567.9, 682.2, 730.08, 730.25, 730.28, 995.91, 995.92, 996.66, 996.67, 996.77, 997.4, 998.11, 998.12, 998.30, 998.31, 998.32, 998.51, 998.59, 998.83, 38.11, 38.40, 41.09, 41.11, 41.12, 41.7, 41.85,                                                                                                                                                                                                                                                                                                                                                                                                                                                                                                                                                                                                                                                                                                                                                                                                                                                                                                                                                                                                                                                                                                                                                                                                                                                                                                                                                                                                                                                                                                                                                                                                                                                          | 30/365                         | Yes            | External             |
| Hollenbeak 2011  | General & vascular         | ICD-9 : 998.59                                                                                                                                                                                                                                                                                                                                                                                                                                                                                                                                                                                                                                                                                                                                                                                                                                                                                                                                                                                                                                                                                                                                                                                                                                                                                                                                                                                                                                                                                                                                                                                                                                                                                                                                                                                                                                                                      | 30                             | Unclear        | Internal, sole       |
| Julian 2006      | All                        | ICD-9: 730.09, 730.20-39, 730.90-730.99, 890.0-890.2, 891.0-891.2, 894.0-894.2, 996.61-996.63, 996.66, 996.67, 996.71, 996.72, 998.0, 998.31, 998.32, 998.51, 998.59, 998.6, 998.83, 999.3, 320.81, 320.82, 320.89, 320.0-320.3, 320.7, 320.9, 321.0-321.4, 321.8, 322.0, 322.9, 324.0, 324.1, 324.9, 420.90, 420.91, 420.99, 421.9, 422.90, 422.91, 513.1, 519.2, 682.1-682.4, 682.6, 682.7, 682.9, 728.0, 730.00-730.08 (PHC4 selection, secondary codes only)                                                                                                                                                                                                                                                                                                                                                                                                                                                                                                                                                                                                                                                                                                                                                                                                                                                                                                                                                                                                                                                                                                                                                                                                                                                                                                                                                                                                                    | LoS                            | No             | External             |
| Kanerva 2009     | All                        | ICD-10 (first 3 slots): O86, T81.4, T84.5, T84.68, T82.7or A40, A41, A46, A48.8, A49, M00, M01, M46*B95.7 with or without T72.1, T21.2, Y83, Y84, Y88                                                                                                                                                                                                                                                                                                                                                                                                                                                                                                                                                                                                                                                                                                                                                                                                                                                                                                                                                                                                                                                                                                                                                                                                                                                                                                                                                                                                                                                                                                                                                                                                                                                                                                                               | LoS                            | No             | Internal, sole       |

| Study          | Procedure                          | Codes used (Inpatient only, primary & secondary unless specified)                                                                                                                                                                                                                                                                                                                                                                                                                                                                                                                                                                                                                                                                                    | Duration follow-up | Includes readm | Purpose of algorithm |
|----------------|------------------------------------|------------------------------------------------------------------------------------------------------------------------------------------------------------------------------------------------------------------------------------------------------------------------------------------------------------------------------------------------------------------------------------------------------------------------------------------------------------------------------------------------------------------------------------------------------------------------------------------------------------------------------------------------------------------------------------------------------------------------------------------------------|--------------------|----------------|----------------------|
| Lawson 2012    | All                                | ICD-9: 998.5, 998.51, 998.59<br>Also includes outpatient                                                                                                                                                                                                                                                                                                                                                                                                                                                                                                                                                                                                                                                                                             | 30                 | Yes            | External             |
| Lee 2011*      | Gastric cancer patients            | ICD-10 Mapped to PHC4 selection (see Julian)                                                                                                                                                                                                                                                                                                                                                                                                                                                                                                                                                                                                                                                                                                         | Los                | No             | Internal, comb       |
| Leth 2006†     | Orthopedic Abdominal               | ICD-10, T81.4                                                                                                                                                                                                                                                                                                                                                                                                                                                                                                                                                                                                                                                                                                                                        | LoS                | No             | Internal, comb       |
| Moro 2004      | NNIS Procedures                    | ICD-9: three different sets of codes<br>Group 1: 958.3, 996.60-996.69, 998.5, 998.51, 998.59<br>Additional group 2: group 1 + 254.1, 320.0, 320.2, 320.3, 320.8, 320.9, 321.0, 324.0, 324.1, 324.9, 2360.01, 360.00, 360.02, 360.04, 370.55, 373.13, 383.0-, 420.99, 421.0, 421.9, 424.90, 422.0, 422.90, 422.92, 422.99, 420.90, 447.6, 451-, 461.0-461.9, 475, 478.22, 478.24, 510.0-510.9, 513.0, 513.1, 519.2, 527.3, 528.3, 567.-, 566, 569.5, 572.0, 577.0, 590.10-590.11, 590.80, 590.2, 597.0, 597.80-, 599.0, 601.2, 604.0, 611.0, 614.0, 614.3, 614.5, 614.8, 614.9, 615.0, 615.9, 616.0, 616.1-, 675.10, 683, 711.0-, 711.4-, 711.6-, 711.8-, 711.9-, 727.00, 727.3, 730.00-730.09..<br>Group 3: group 1 + group 2 + 998.6, 998.83, 999.3 | LoS                | No             | Internal, comb       |
| Sherman 2006*  | All                                | ICD-9 as selected by PHC4 (see Julian)                                                                                                                                                                                                                                                                                                                                                                                                                                                                                                                                                                                                                                                                                                               | LoS                | No             | External             |
| Spolaore 2005  | All                                | ICD-9: 998.5, 996.6 (not 996.64) or 958.3                                                                                                                                                                                                                                                                                                                                                                                                                                                                                                                                                                                                                                                                                                            | LoS                | No             | Internal, comb       |
| Stevenson 2008 | All                                | Secondary ICD-9 as selected by PHC4 (see Julian).<br>Outpatient codes unclear.                                                                                                                                                                                                                                                                                                                                                                                                                                                                                                                                                                                                                                                                       | 30/365             | Yes            | External             |
| Tinelli 2011*  | All                                | ICD-9 (up to 5 secondary): 264 codes, details not specified (no reply from corresponding author)<br>Rehabilitation facility only 3x                                                                                                                                                                                                                                                                                                                                                                                                                                                                                                                                                                                                                  | LoS                | No             | Internal, sole       |
| Verelst 2010   | All                                | ICD-9: 998.51 or 998.59 in secondary diagnosis field, excl primary diagnoses for SSI and age < 16.                                                                                                                                                                                                                                                                                                                                                                                                                                                                                                                                                                                                                                                   | LoS                | No             | External             |
| Yokoe 2012     | Hysterectomy, vascular, colorectal | ICD-9: 998.5, 998.51, 998.59, 996.60, 996.62                                                                                                                                                                                                                                                                                                                                                                                                                                                                                                                                                                                                                                                                                                         | 30/365             | Yes            | Internal, comb       |

Abbreviations: CABG – coronary artery bypass graft, LoS – Length of Stay, PHC4 – Pennsylvania Healthcare Cost Containment Council, SSI – surgical site infection, THA – total hip arthroplasty, TKA – total knee arthroplasty,



**Table S6: Administrative data algorithm, by HAI type, cont'd**

\*: studies presenting only accuracy estimates aggregated over multiple types of HAI.

†: studies assessing an algorithm combining multiple sources of data that did not allow for data-extraction for administrative data only.

**CLABSI**

| Study          | Denominator                                                          | Codes used (Inpatient only, primary & secondary unless specified)                                                                                                                                                                                                                                                                                                                 | Purpose of algorithm |
|----------------|----------------------------------------------------------------------|-----------------------------------------------------------------------------------------------------------------------------------------------------------------------------------------------------------------------------------------------------------------------------------------------------------------------------------------------------------------------------------|----------------------|
| Cevasco 2011   | Within algorithm                                                     | PSI 7, version 3.1:<br>ICD-9: 999.3, 999.62 in secondary diagnosis field; not PoA<br>Excludes some high-risk patients based on primary diagnoses                                                                                                                                                                                                                                  | External             |
| Cima 2011      | Within algorithm                                                     | Idem Cervasco 2011                                                                                                                                                                                                                                                                                                                                                                | External             |
| Moehring, 2013 | Within algorithm                                                     | CMS rule: 999.31 + PoA negative                                                                                                                                                                                                                                                                                                                                                   | External             |
| Pokorny, 2006* | Unclear                                                              | ICD-9 codes for 'clinical infection: 038, 038.0, 038.1, 038.2, 038.3, 038.4, 038.8, 038.9, 360.0, 360.1, 480, 481, 482.0, 482.1, 482.2, 482.4, 482.8, 482.9, 483, 484, 485, 486, 590.10, 595.0, 599.0, 646.60, 646.61, 646.62, 646.63, 646.64, 646.6[0-4], 670, 670.02, 670, 674.34 [4], 790.7, 421.0, 421.1, 421.9, 996.6, 996.61, 996.62, 996.64, 996.69, 998.5, 998.51, 998.59 | Internal, comb       |
| Scanlon 2008   | Within algorithm                                                     | Pediatric quality indicator: 999.3, 999.62 (does not include PoA indicator)<br>Denominator: Age 0 – 17, admitted without infection as primary diagnosis,                                                                                                                                                                                                                          | External             |
| Sherman 2006*  | Within algorithm                                                     | ICD-9: specified by PHC4 (secondary diagnoses)<br>0380, 038.1, 038.11, 038.19, 038.2, 038.3, 38.40, 38.41, 38.42, 38.43, 38.44, 38.49, 38.8, 38.9, 790.7, 995.9, 995.91, 995.92, 995.92                                                                                                                                                                                           | External             |
| Stamm 2012     | Identified by traditional surveillance                               | ICD-9; details not specified (no reply from corresponding author)                                                                                                                                                                                                                                                                                                                 | Internal, sole       |
| Stevenson 2008 | Patients with a positive blood culture                               | ICD-9: specified by PHC4 (secondary diagnoses)<br>0380, 038.1, 038.11, 038.19, 038.2, 038.3, 38.40, 38.41, 38.42, 38.43, 38.44, 38.49, 38.8, 38.9, 790.7, 995.9, 995.91, 995.92, 995.92                                                                                                                                                                                           | External             |
| Stone 2007     | Within algorithm                                                     | PSI 7, version 2.1                                                                                                                                                                                                                                                                                                                                                                | External             |
| Tehrani 2013   | Sens: patients in routine surveillance<br>PPV: within code selection | CMS HAC rule: 999.31 + PoA negative                                                                                                                                                                                                                                                                                                                                               | External             |
| Zrelak 2011    | Within algorithm                                                     | PSI 7, version 3.1:<br>ICD-9: 999.3, 999.62 in secondary diagnosis field; not PoA Excludes some high-risk patients from denominator based on primary diagnoses                                                                                                                                                                                                                    | External             |

Abbreviations: CLABSI – central-line associated bloodstream infection, CMS – Centers for Medicare and Medicaid Services, HAC – Hospital-acquired condition, PoA – present on Admission, PHC4 – Pennsylvania Health Care Cost Containment Council, PSI – patient safety indicator,

**Table S6: Administrative data algorithm, by HAI type, cont'd**

\*: studies presenting only accuracy estimates aggregated over multiple types of HAI.

†: studies assessing an algorithm combining multiple sources of data that did not allow for data-extraction for administrative data only.

**Bloodstream infection/Sepsis**

| Study          | Codes used (Inpatient only, Primary & secondary unless specified)                                                                                                                                                                                                                                                                                                                                                                                                            | Purpose of algorithm |
|----------------|------------------------------------------------------------------------------------------------------------------------------------------------------------------------------------------------------------------------------------------------------------------------------------------------------------------------------------------------------------------------------------------------------------------------------------------------------------------------------|----------------------|
| Best 2002      | ICD-9: 998.0 - 38.0 - 38.9, 785.5, 785.59                                                                                                                                                                                                                                                                                                                                                                                                                                    | External             |
| Braun 2006†    | Compares several algorithms at the aggregate level.<br>Does not detail all algorithms                                                                                                                                                                                                                                                                                                                                                                                        | External             |
| Cevasco 2011a  | PSI 13, version 3.1<br>Secondary ICD9 diagnoses (not PoA) : 038.0, 38.1, 038.10, 38.11, 038.12, 38.19, 38.2, 0383, 785.52, 785.59, 998.0, 995.91, 995.92, 038.4, 038.41, 038.42, 038.43, 038.44, 038.49, 038.8, 0389.<br>Numerator: Patients aged over 18 undergoing an elective procedure with LoS > 3 days . Excludes patients with principal diagnosis of infection/sepsis, patients with infection PoA, patients with cancer/immunosuppression and obstetric admissions. | External             |
| Cevasco 2011b  | PSI 13, version 3.1 (idem Cevasco 2011a)                                                                                                                                                                                                                                                                                                                                                                                                                                     | External             |
| Cima 2011      | PSI 13, version 3.1 (idem Cevasco 2011a)                                                                                                                                                                                                                                                                                                                                                                                                                                     | External             |
| Gerbier 2011   | ICD-10: A021, A207, A217, A227, A241, A267, A280, A327, A392, A393, A394, A40-, A41-, A427, A483, A499, A548, B007, B377, O080, O753, O85, P3600, P3610, P3620, P3630, P3640, P3650, P3680, P3690                                                                                                                                                                                                                                                                            | Internal, sole       |
| Houglund 2008  | ICD-9: 038.0, 038.10, 038.11, 038.19, 038.3, 038.40, 038.41, 038.42, 038.43, 038.44, 038.49, 038.8, 038.9, 790.7                                                                                                                                                                                                                                                                                                                                                             | Ext                  |
| Kanerva 2009   | ICD-10 (first 3 slots): A40, A41, B37, R 50.9, J15.9, J 18.9, K80, N30 with or without Y82, Y83                                                                                                                                                                                                                                                                                                                                                                              | Internal, sole       |
| Koch 2012      | PSI 13, version 4.2<br>Secondary ICD9 diagnoses (not PoA) : 038.0, 38.1, 038.10, 38.11, 038.12, 38.19, 38.2, 0383, 785.52, 785.59, 998.0, 995.91, 995.92, 038.4, 038.41, 038.42, 038.43, 038.44, 038.49, 038.8, 0389.<br>Numerator: Patients aged over 18 undergoing an elective procedure with LoS > 3 days . Excludes patients with principal diagnosis of infection/sepsis, with infection PoA, with cancer/immunosuppression and obstetric admissions.                   | Ext                  |
| Lawson 2012    | ICD-9: 038*, 785.52, 995.91, 995.92, 998.0, 998.59, 999.31 (incl outpatient)                                                                                                                                                                                                                                                                                                                                                                                                 | External             |
| Lee 2011*      | ICD-10 Mapped to PHC4 selection: 0380, 038.1, 038.11, 038.19, 038.2, 038.3, 38.40, 38.41, 38.42, 38.43, 38.44, 38.49, 38.8, 38.9, 790.7, 995.9, 995.91, 995.92, 995.92.<br>No reply from corresponding author regarding exact code selection.                                                                                                                                                                                                                                | Internal, comb       |
| Murff 2011     | PSI 13, version 3.1                                                                                                                                                                                                                                                                                                                                                                                                                                                          | External             |
| Ollendorf 2002 | Presence of codes indicative of sepsis on first 9 positions of UB-92 bill<br>003.1, 020.2, 022.3, 036.2, 038.0 038.1, 038.2, 038.3, 038.4, 038.41, 038.42, 038.43, 038.44, 038.49, 038.8, 038.9, 054.5, 790.7,                                                                                                                                                                                                                                                               | Internal, sole       |
| Romano 2009    | PSI 13 version 2.1 (ICD-9).<br>Original: any 38.xx code in secondary diagnosis field.<br>Revised: 38.xx code in secondary diagnosis field or code 998.0, 998.1, 785.59, 785.5, 785.52<br>No accounting for PoA. Denominator same as other PSI studies                                                                                                                                                                                                                        | External             |
| Scanlon 2008   | PDI (ICD-9).<br>Numerator: secondary diagnosis code for sepsis, without PoA indicator<br>Denominator: Age 0-17, non-neonate, LoS > 4 days, without sepsis of infection as primary diagnosis                                                                                                                                                                                                                                                                                  | External             |
| Verelst 2010   | PSI 13, version 3.1 (see Cevasco 2011a)                                                                                                                                                                                                                                                                                                                                                                                                                                      | External             |

Abbreviations: CLABSI – central-line associated bloodstream infection, CMS – Centers for Medicare and Medicaid Services, HAC – Hospital-acquired condition, LoS – length of stay, PoA – present on Admission, PHC4 – Pennsylvania Health Care Cost Containment Council, PDI – pediatric quality indicator, PSI – patient safety indicator,

### Table S6: Administrative data algorithm, by HAI type, cont'd

\*: studies presenting only accuracy estimates aggregated over multiple types of HAI.

†: studies assessing an algorithm combining multiple sources of data that did not allow for data-extraction for administrative data only.

#### CAUTI

| Study         | Denominator                                                                                                                  | Codes used (Inpatient only, primary & secondary unless specified)                                                                                                                                                                                                                                      | Purpose of algorithm |
|---------------|------------------------------------------------------------------------------------------------------------------------------|--------------------------------------------------------------------------------------------------------------------------------------------------------------------------------------------------------------------------------------------------------------------------------------------------------|----------------------|
| Meddings 2010 | Within algorithm (996.64)                                                                                                    | ICD-9: Secondary code 112.2, 590.10, 590.11, 590.2, 590.3, 590.80, 590.81, 595.0, 597.0, and 599.0 with or without PoA.                                                                                                                                                                                | External             |
| Pokorny 2006* | Unclear                                                                                                                      | ICD-9 codes for 'clinical infection, see under CLABSI                                                                                                                                                                                                                                                  | Internal, comb       |
| Sherman 2006* | Within algorithm                                                                                                             | ICD-9: 590.00, 590.01, 590.1, 590.11, 590.2, 590.3, 590.8, 590.9, 595.0, 595.1, 595.2, 595.3, 595.81, 595.89, 595.9, 599.0, 9975.                                                                                                                                                                      | External             |
| Zhan 2009     | Within algorithm 1. Procedure code 57.94 or 57.95<br>2. Claims with major surgery<br>3. Claims with any ICD-9 procedure code | ICD-9 in secondary diagnosis fields: 996.64, 112.2, 590.10, 590.11, 590.2, 590.8, 590.81, 590.9, 595.0, 595.3, 595.4, 595.89, 595.9, 597.0, 597.80, 599.0<br>Excluding discharges with primary discharge codes for sepsis or infection or any discharge code for immunosuppression (in analogy to PSI) | External             |

Abbreviations: CAUTI – catheter-associated urinary tract infection, PoA – present on admission, PSI – patient safety indicator

#### UTI

| Study          | Codes used (Inpatient only, primary & secondary unless specified)                                                                                 | Purpose of algorithm |
|----------------|---------------------------------------------------------------------------------------------------------------------------------------------------|----------------------|
| Best 2002      | ICD-9: 599.0, 590.1 - 590.9, 595.0 - 595.9                                                                                                        | External             |
| Campbell 2011† | Requested from corresponding authors; not available                                                                                               | Internal, sole       |
| Gerbier 2011   | ICD-10: N300, N34-, N390, O862, O863, T835                                                                                                        | Internal, sole       |
| Heisler 2009   | Hospital adaptation of ICD-9 codes, equivalent to 599.0 and 999.64                                                                                | Internal, sole       |
| Julian 2006    | ICD-9: 590.00, 590.01, 590.10, 590.11, 590.2, 590.3, 590.80, 590.9, 595.0-595.3, 595.81, 595.89, 595.9, 599.0, 997.5 (secondary codes only, PHC4) | External             |
| Kanerva 2009   | ICD-10: N30, N39, A41, R50.9; first three slots only                                                                                              | Internal, sole       |
| Landers 2010   | ICD-9: 599.0                                                                                                                                      | Internal, sole       |
| Lawson 2010    | ICD-9: 112.2, 590.1*, 590.3, 590.8*, 595.0, 595.30, 599.0, 996.64                                                                                 | External             |
| Lee 2011*      | ICD-10 Mapped to PHC4 selection (see Julian)<br>No reply from corresponding author regarding exact code selection.                                | Internal, comb       |
| Tinelli 2011*  | ICD-9 (up to 5 secondary): 264 codes, details not specified (no reply from corresponding author)<br>Rehabilitation facility only                  | Internal, sole       |

Abbreviations: UTI –urinary tract infection, PHC4 – Pennsylvania Health Care Cost Containment Council.

**Table S6: Administrative data algorithm, by HAI type, cont'd**

\*: studies presenting only accuracy estimates aggregated over multiple types of HAI.

†: studies assessing an algorithm combining multiple sources of data that did not allow for data-extraction for administrative data only.

**VAP**

| Study          | Denominator                                                                                          | Codes used (Inpatient only, primary & secondary unless specified)                                                                                                                                             | Purpose of algorithm |
|----------------|------------------------------------------------------------------------------------------------------|---------------------------------------------------------------------------------------------------------------------------------------------------------------------------------------------------------------|----------------------|
| Drees 2010     | Within algorithm                                                                                     | ICD-9: 999.9                                                                                                                                                                                                  | Internal, sole       |
| Julian 2006    | Within algorithm (code for mechanical ventilation)                                                   | ICD-9 (secondary codes only according to PHC4): 480.0-480.3, 480.8, 480.9, 481, 482.0-482.2, 482.30-482.32, 482.39-482.41, 482.82-482.84, 482.89, 482.9, 483.0, 483.1, 483.8, 485, 486, 487.0, 482.49, 482.81 | External             |
| Pokorny 2006*  | Unclear                                                                                              | ICD-9 codes for 'clinical infection, see under CLABSI                                                                                                                                                         | Internal, comb       |
| Sherman 2006*  | Within algorithm                                                                                     | ICD-9 (secondary codes only according to PHC4): 480.0-480.3, 480.8, 480.9, 481, 482.0-482.2, 482.30-482.32, 482.39-482.41, 482.82-482.84, 482.89, 482.9, 483.0, 483.1, 483.8, 485, 486, 487.0, 482.49, 482.81 | External             |
| Stamm 2012     | Identified by traditional surveillance                                                               | ICD-9; details not specified (no reply from corresponding author)                                                                                                                                             | Internal, sole       |
| Stevenson 2008 | Patients with ventilator procedure code (31.1, 31.2, 31.29, 31.21, 96.04, 96.7, 96.70, 96.71, 96.72) | ICD-9 (secondary codes only according to PHC4): 480.0-480.3, 480.8, 480.9, 481, 482.0-482.2, 482.30-482.32, 482.39-482.41, 482.82-482.84, 482.89, 482.9, 483.0, 483.1, 483.8, 485, 486, 487.0, 482.49, 482.81 | External             |
| Verelst 2010   | Belgian nomenclature code for artificial ventilation (211046)                                        | PSI version 3.1<br>ICD-9 codes for pneumonia in secondary field.<br>Excludes primary diagnosis of pneumonia or 997.3, or viral pneumonia, immunocompromised, < 16 years.                                      | External             |

Abbreviations: PHC4 – Pennsylvania Health Care Cost Containment Council, PSI – patient safety indicator, VAP – ventilator-associated pneumonia.

**Pneumonia (sometimes also including VAP)**

| Study         | Codes used (Inpatient only, primary & secondary unless specified)                                                                                                                                                                                                                                                                                                                                                                                                                                                                                                                                                                                            | Purpose of algorithm |
|---------------|--------------------------------------------------------------------------------------------------------------------------------------------------------------------------------------------------------------------------------------------------------------------------------------------------------------------------------------------------------------------------------------------------------------------------------------------------------------------------------------------------------------------------------------------------------------------------------------------------------------------------------------------------------------|----------------------|
| Best 2002     | ICD-9: 997.3, 480.0 - 487.0                                                                                                                                                                                                                                                                                                                                                                                                                                                                                                                                                                                                                                  | External             |
| Gerbier 2011  | ICD-10: J10-, J11-, J12-, J13-, J14-, J15-, J16-, J17-, J18-,                                                                                                                                                                                                                                                                                                                                                                                                                                                                                                                                                                                                | Internal, sole       |
| Hougland 2008 | ICD-9: 481, 482.0, 482.1, 482.2, 482.30, 482.31, 482.32, 482.39, 482.40, 482.41, 482.49, 482.81, 482.82, 482.83, 482.84, 482.89, 482.9, 483.8, 485, 486.                                                                                                                                                                                                                                                                                                                                                                                                                                                                                                     | External             |
| Kanerva 2009  | ICD-10: J13, J15.9, J18.9, J20.9, J60.9, J05, J38.5, B59, R91; first three slots only                                                                                                                                                                                                                                                                                                                                                                                                                                                                                                                                                                        | Internal, sole       |
| Lawson 2012   | ICD-9: 39.1, 1124, 1179, 1363, 4466.19, 480*, 481, 482*, 483*, 4841, 4846, 4847, 485, 486, 4870, 507*, 5130, 5168, 997.31, 997.39                                                                                                                                                                                                                                                                                                                                                                                                                                                                                                                            | External             |
| Lee 2011*     | ICD-10 Mapped to PHC4 selection (see Julian).<br>No reply from corresponding author regarding exact code selection.                                                                                                                                                                                                                                                                                                                                                                                                                                                                                                                                          | Internal, comb       |
| Murff 2011    | PSI version 3.1 for pneumonia as a component of <i>Failure to Rescue (PSI 4)</i><br>ICD-9 codes: 482.0, 482.1, 482.2, 482.3, 482.3, 482.30, 482.31, 482.32, 482.39, 482.4, 482.40, 482.41, 482.49, 482.8, 482.81, 482.82, 482.83, 482.84, 482.89, 482.9, 485, 486, 507.0 514, excluding cases with a pre-existing condition of pneumonia or 997.3, with any diagnosis code for viral pneumonia, MDC 4 (diseases/disorders of respiratory system) or with any diagnosis of immunocompromised state<br>In this study, the PSI patient population was limited to patients eligible for both the VASQIP measures and PSI criteria (see the article for details). | External             |

Abbreviations: PHC4 – Pennsylvania Health Care Cost Containment Council, PSI – patient safety indicator, VAP – ventilator-associated pneumonia.

**Other**

| Study           | Target infection         | Codes used (Inpatient only, primary & secondary unless specified)                                                                                                                                                             | Purpose of algorithm |
|-----------------|--------------------------|-------------------------------------------------------------------------------------------------------------------------------------------------------------------------------------------------------------------------------|----------------------|
| Van Mourik 2013 | Drain-related meningitis | ICD-9: 112.83, 320.00 – 320.9, 322.00 – 322.9, 324.00 – 324.9, 349.10, 792.00, 996.60, 996.63, 996.70, 996.75, 997.00, 997.01, 997.09, 998.50 – 998.59, 999.30 – 999.39<br>Patients at risk identified by manual surveillance | Internal, sole       |
| Yokoe 2001†     | Post-partum infection    | ICD9: 670.2, 670.04, 599.0, 674.34, 675.14, 675.24, 998.5<br>COSTAR (ambulatory): DA140, DC150, DC408, DH140, DL101, DM153, DR180                                                                                             | Internal, comb       |

Abbreviations: COSTAR: Computer-stored ambulatory record.
